# Supplementary material for: Anion variation on a cobalt(iii) complex of salen-type ligand tethered by four quaternary ammonium salts for CO2/epoxide copolymerization
Source: Royal Society of Chemistry journal article supplement (doi:10.1039/b920992a), 2010-01-01

# Anion variation on a cobalt(III) complex of Salen-type ligand tethered by four quaternary ammonium salts for CO<sub>2</sub>/epoxide copolymerization

*Jina Yoo, Sung Jae Na, Hyeong Cheol Park, Anish Cyriac, and Bun Yeoul Lee\**

<sup>a</sup>Department of Molecular Science and Technology, Ajou University, Suwon 443-749 Korea

bunyeoul@ajou.ac.kr

## Supplementary Information

**<The  $^1\text{H}$  NMR spectra of crude product of 6 showing formation of  $\text{CH}_2\text{Cl}_2$ -attack product 7>**

("s" signals for Salen-unit; "^" signals for coordinated X; "\*" signals for scrambling X; "a" signals for  $\text{CH}_2\text{Cl}_2$ -attack product 7).

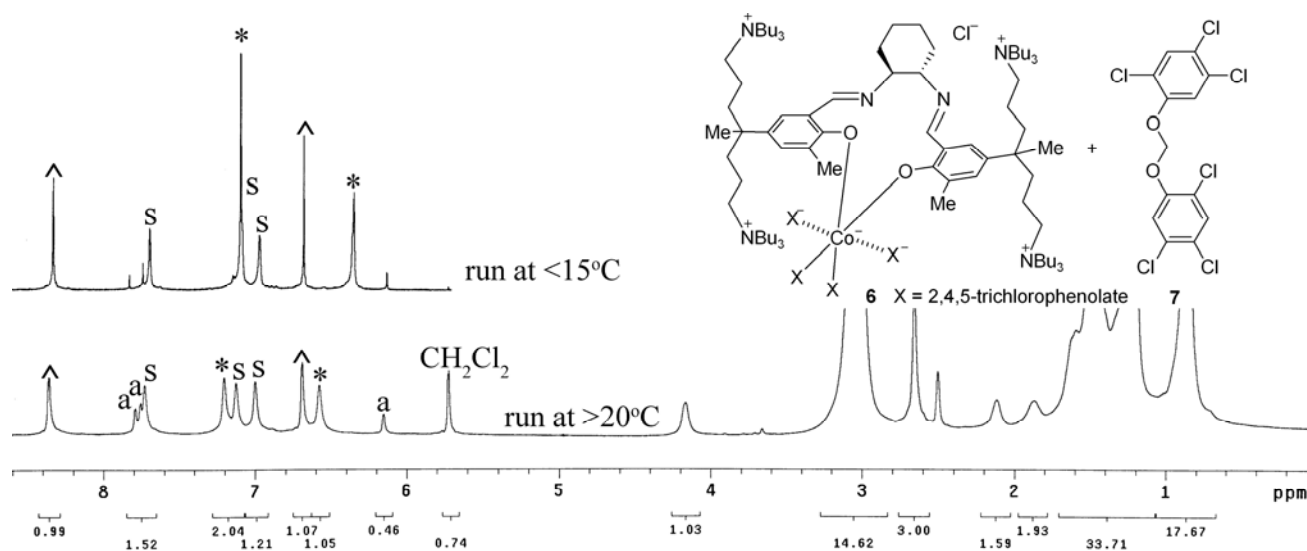

**<The  $^{13}\text{C}$  NMR spectra of 2,4,5-trichlorophenolate (X) complexes 6 and 14 in  $\text{THF-d}_6$ >**

("\*" signals for scrambling X; "#" signals for  $[\text{X}\dots\text{H}\dots\text{X}]$ ; "a" signals for  $\text{CH}_2\text{Cl}_2$ -attacking product 7).

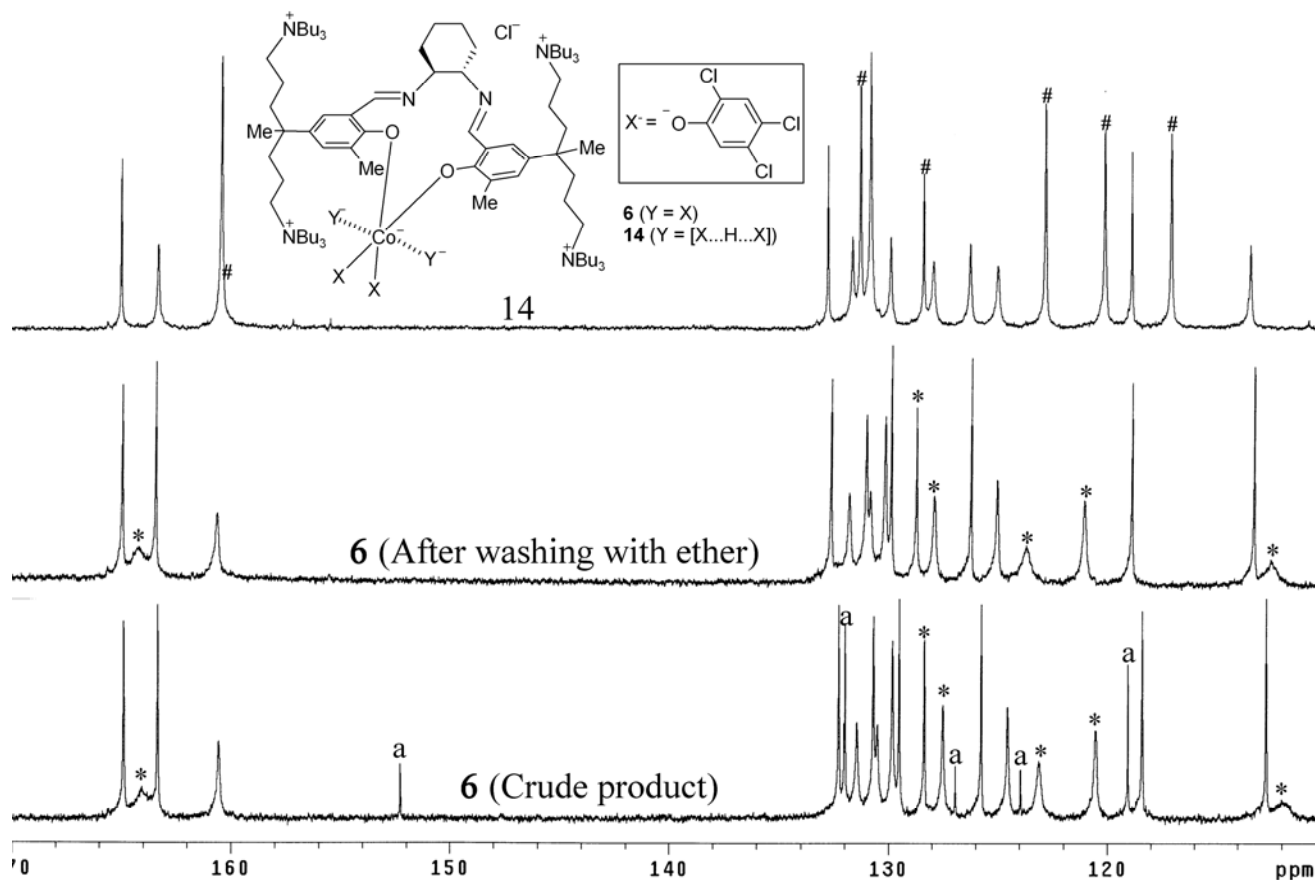

<The variable temperature  $^1\text{H}$  NMR spectra of **6**>

("s" signals for Salen-unit; "^" signals for coordinated X; "\*" signals for scrambling X)

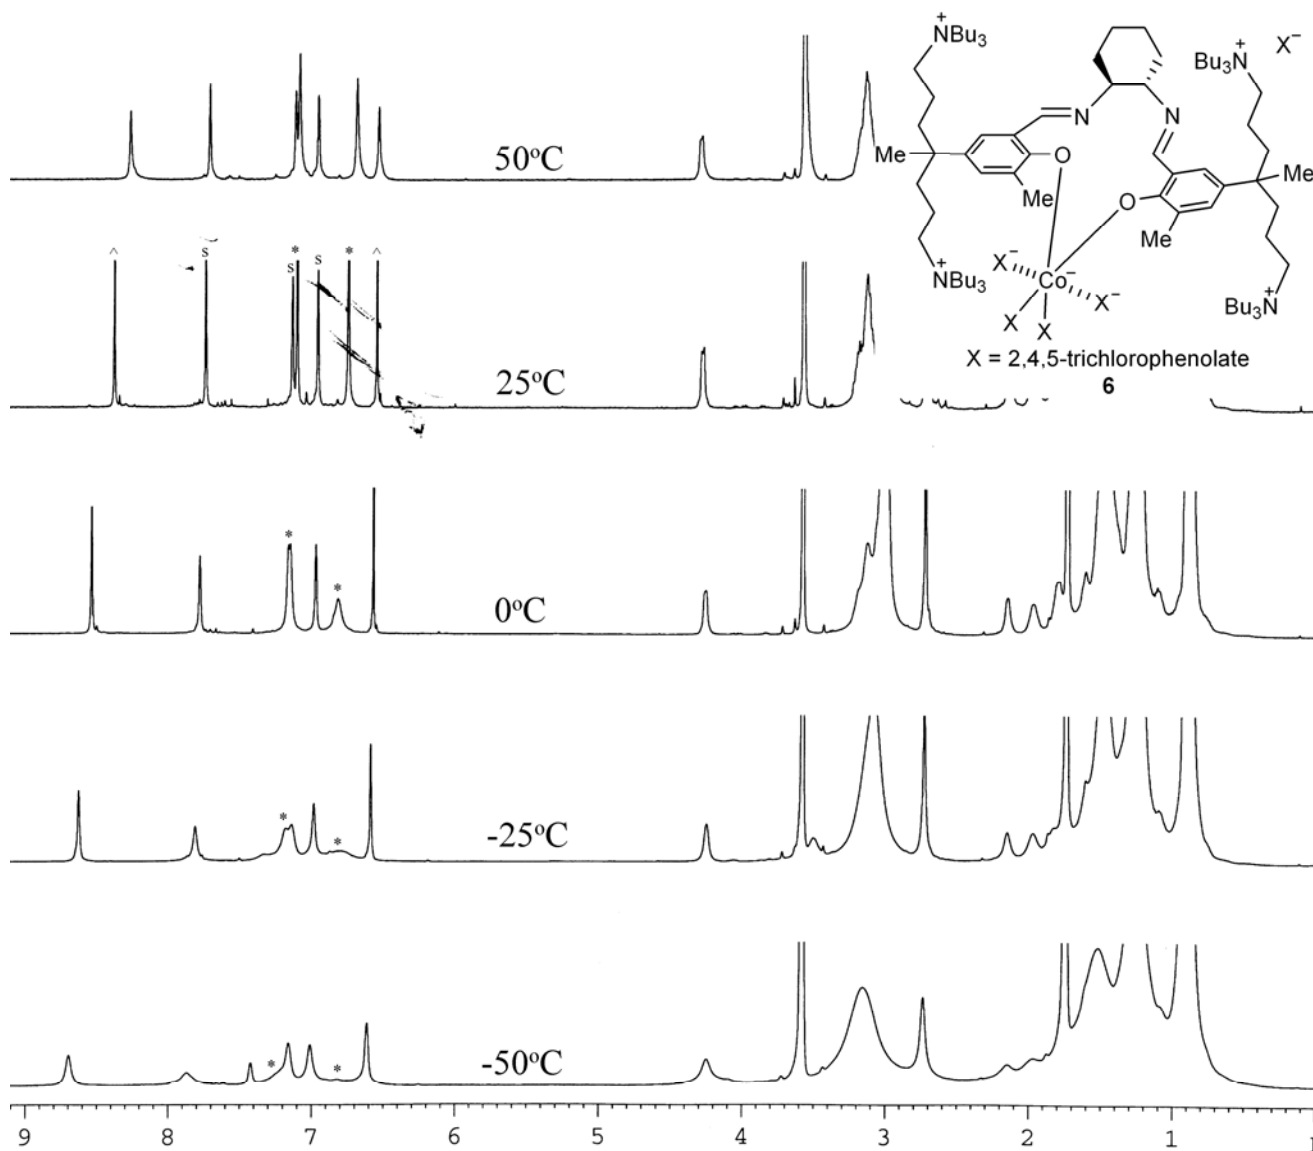

<The  $^1\text{H}$  NMR spectra of 4-nitrophenolate (X) complexes 10 and 15>

("s" signals for Salen-unit; "^" signals for coordinated X; "\*" signals for uncoordinated X; "#" signals for  $[\text{X}\dots\text{H}\dots\text{X}]$ ).

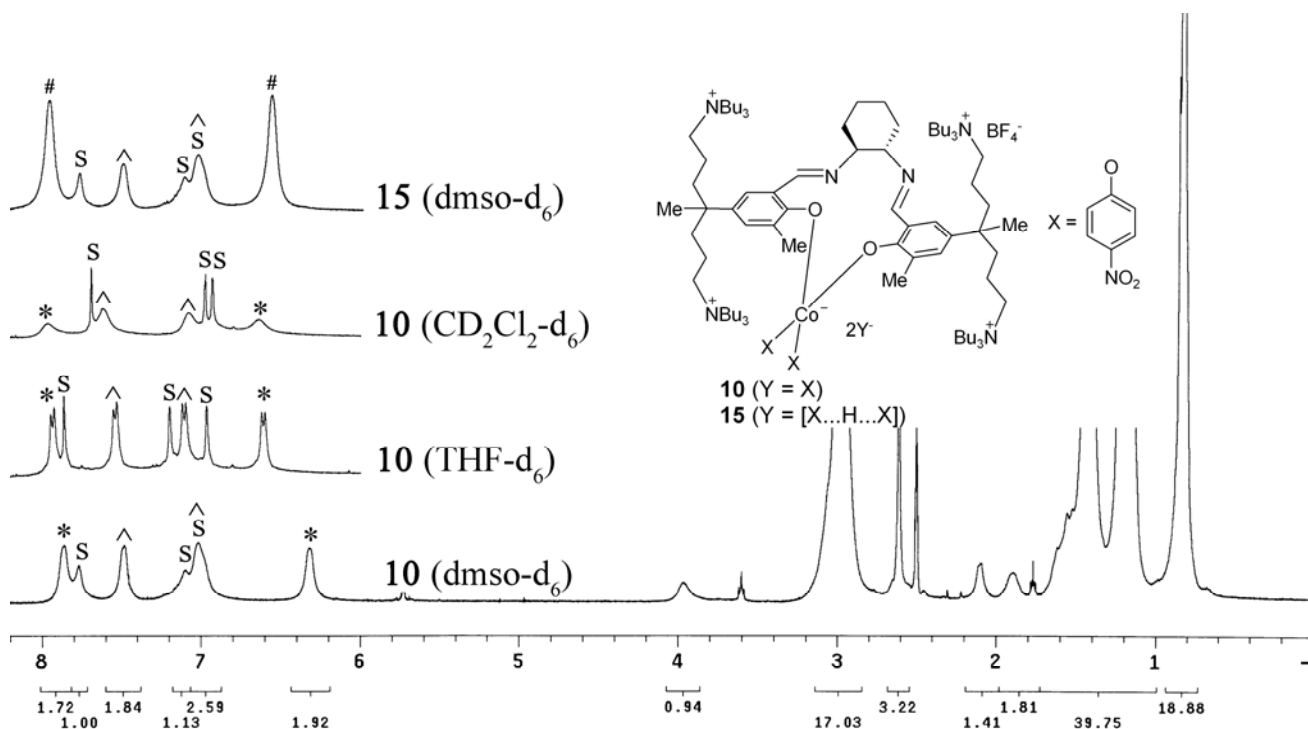

< $^{13}\text{C}$  NMR spectra (aromatic region) of 4-nitrophenolate (X) complexes 10 and 15 in dms $-\text{d}_6$ >

("\*" signals for uncoordinated X; "#" signals for  $[\text{X}\dots\text{H}\dots\text{X}]$ )

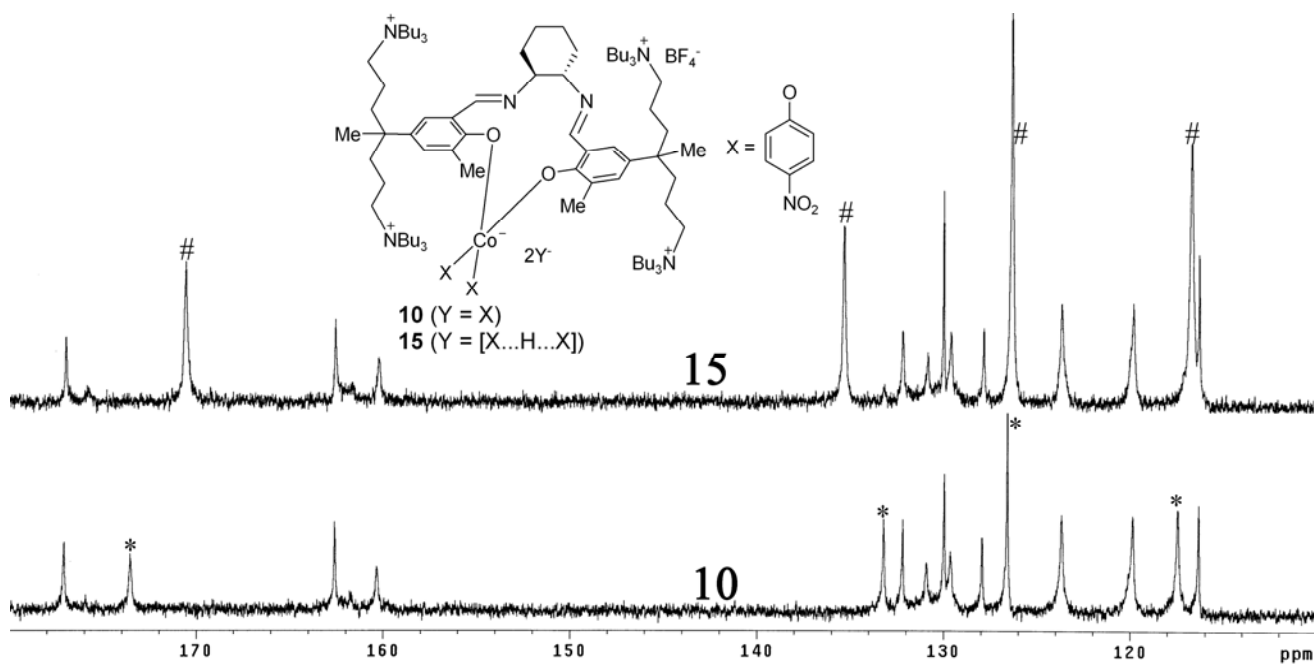

<The IR spectra of 10, 15, and sodium 4-nitrophenolate >

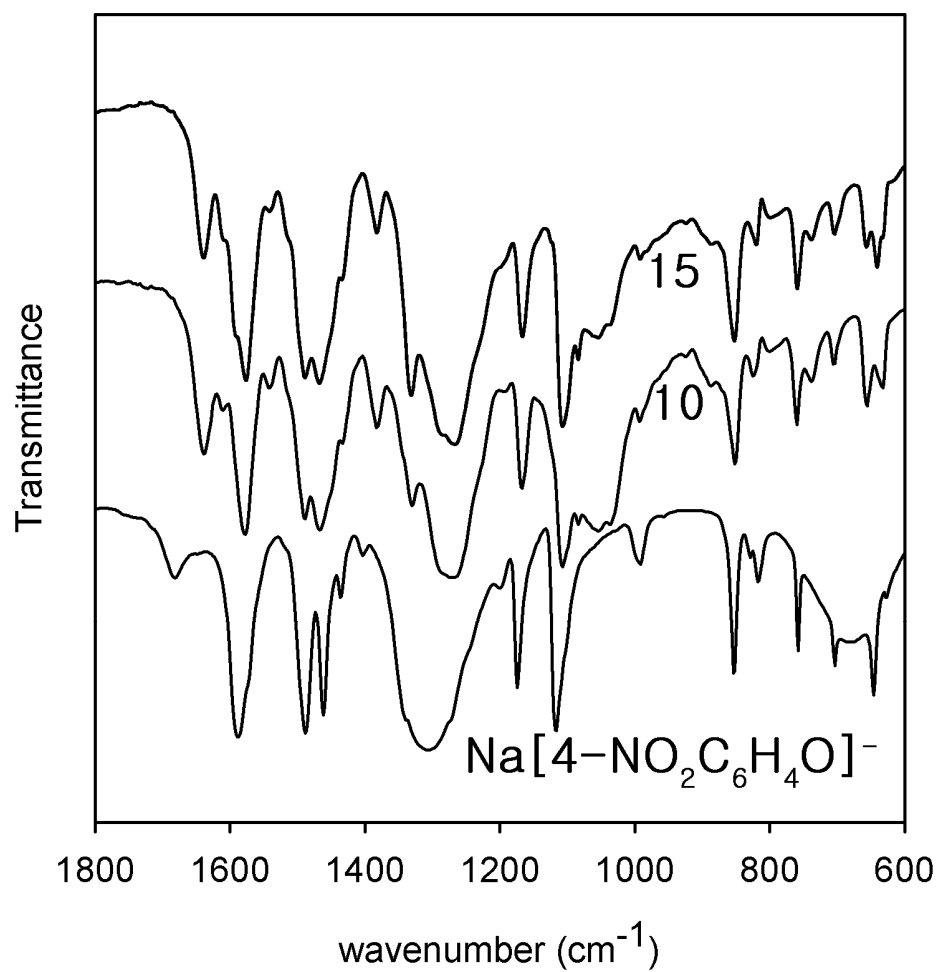



<The obtained viscous polymerization solution and the isolated resin (entry 9 in Table 1)>

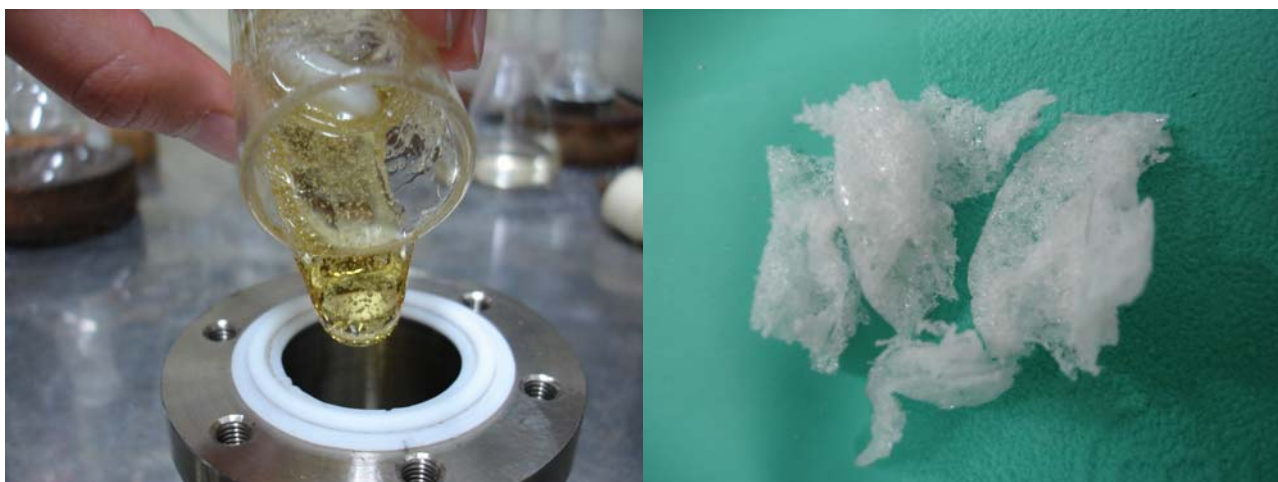

Supplement: b920992a.pdf [file b920992a.pdf]
